# Supplementary material for: Discriminating mild from critical COVID-19 by innate and adaptive immune single-cell profiling of bronchoalveolar lavages
Source: PubMed Central journal article supplement (PMC8027624; doi:10.1038/s41422-020-00455-9), 2021-01-21
Supplement: 41422_2020_455_MOESM1_ESM.pdf [file 41422_2020_455_MOESM1_ESM.pdf]

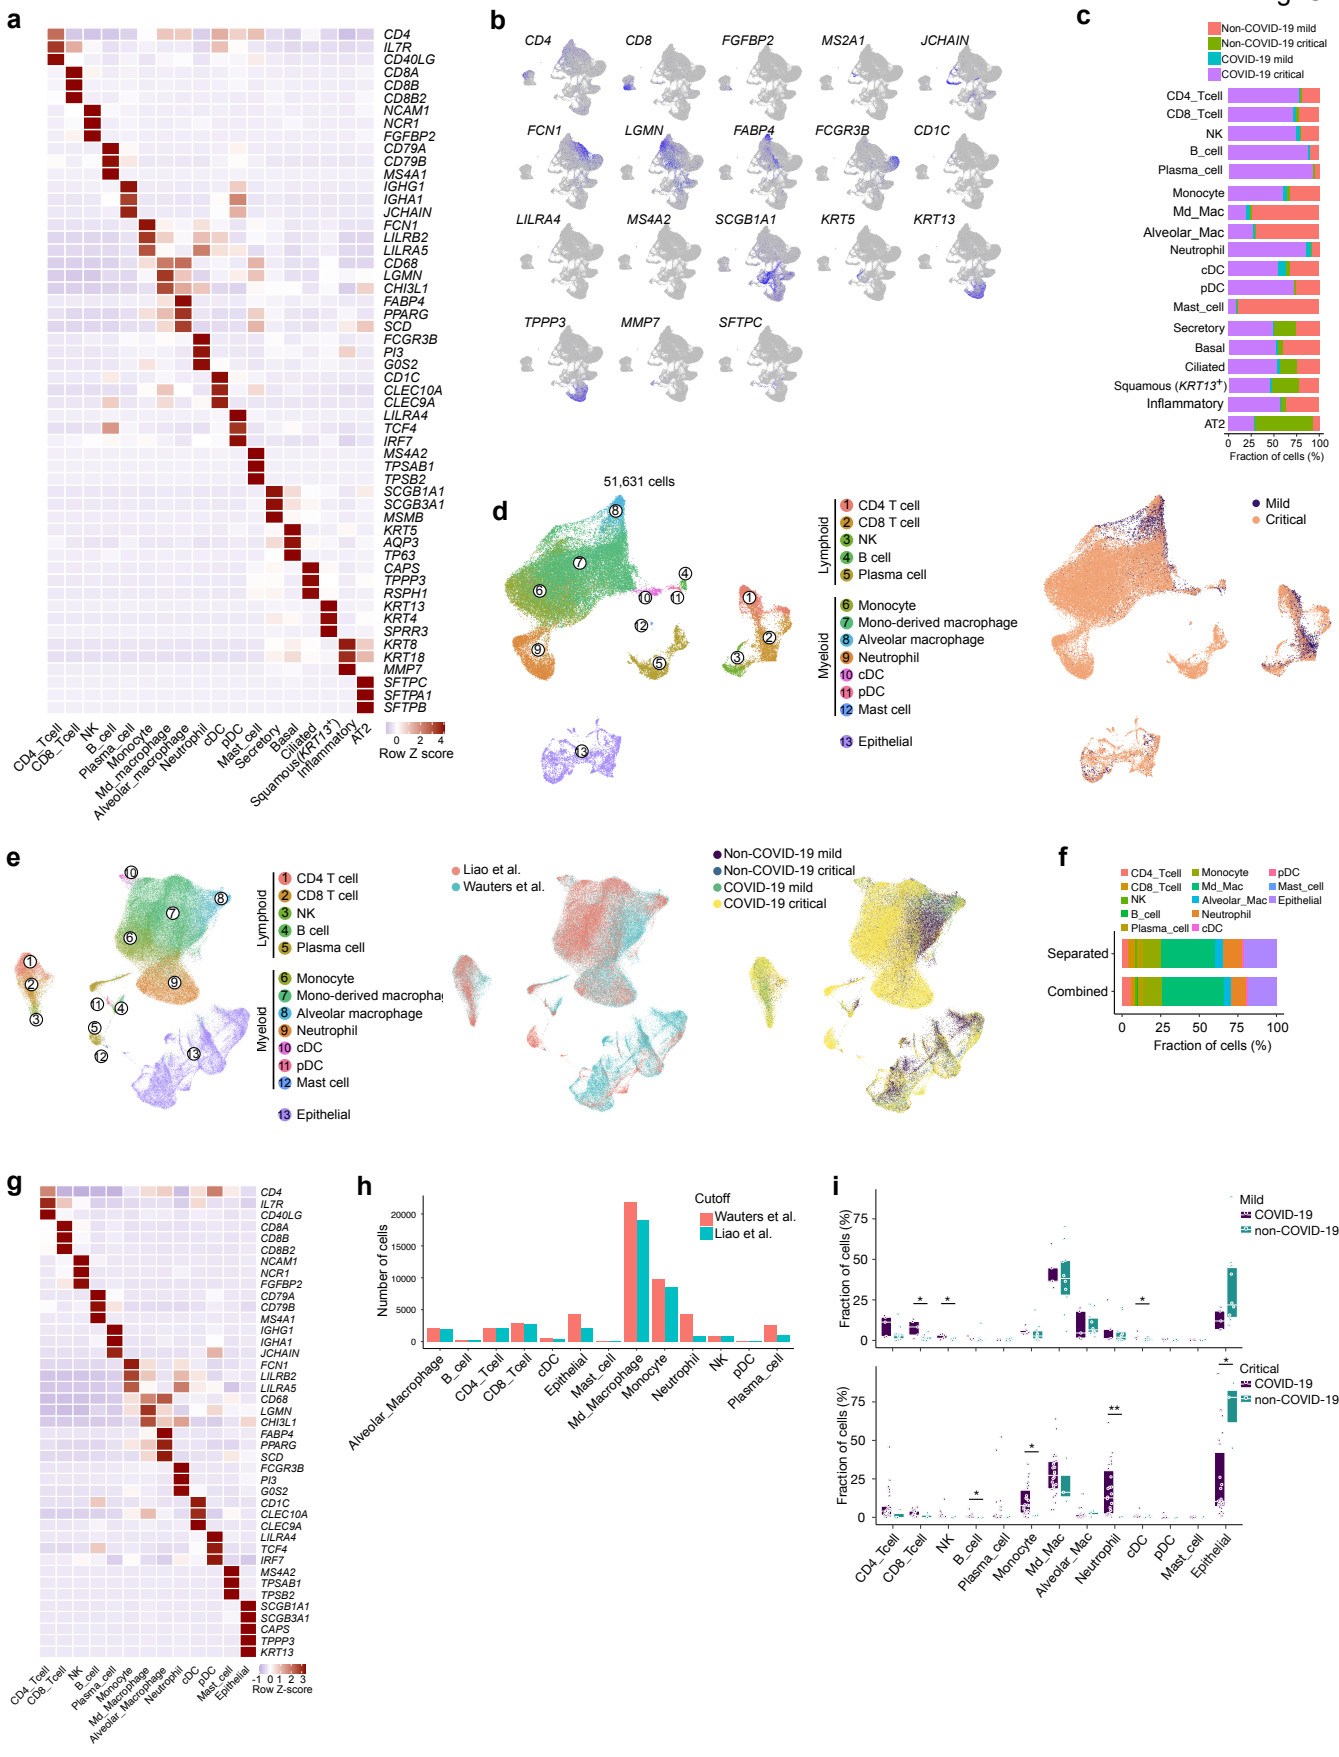

**Fig. S1 Cell type annotation and clustering of scRNA-seq data by Liao et al.**

**a-b** Heatmap showing the expression of 3 marker genes (**a**) and feature plots showing 1 marker gene (**b**) for each of the different cell types. **c** Fraction of cell type per disease (COVID-19 vs non-COVID-19) and severity of the disease (mild vs critical). **d** UMAP showing 51,631 cells identified in scRNA-seq data by Liao et al., color-coded per cell type (left) and per disease severity status (right). **e** UMAP representation of merged datasets (Liao et al., and Wauters et al.) by scRNA-seq color-coded for the indicated cell type (left), the dataset (middle) and the disease (right). **f** Fraction of each cell type as determined by clustering both datasets separately or together. **g** Heatmap showing cell types with corresponding marker genes and functional gene sets. **h** Number of cells detected for each cell type using two quality cutoffs: the cutoff described in Wauters et al. vs the cutoff described in Liao et al. **i** Relative contribution of each cell type (in %) in COVID-19 vs non-COVID-19 in mild (upper panel) and critical disease (lower panel).
