# Supplementary material for: Discriminating mild from critical COVID-19 by innate and adaptive immune single-cell profiling of bronchoalveolar lavages
Source: PubMed Central journal article supplement (PMC8027624; doi:10.1038/s41422-020-00455-9), 2021-01-21
Supplement: 41422_2020_455_MOESM2_ESM.pdf [file 41422_2020_455_MOESM2_ESM.pdf]

## Fig. S2 Single-cell profiling of T-/NK-cell phenotypes

**a** UMAP showing 23,468 T-/NK-cells color-coded per data origin (left) and per COVID-19 disease status (right). **b** Heatmap showing T-/NK-cell phenotypes with corresponding marker genes and functional gene sets. **c** UMAP for the expression of key T<sub>FH</sub> markers (*CXCR5*, *BCL6*, *IL21*, and *ICOS*) and other helper T-cell markers (*PDCD1*, *IFNG*), suggesting a lack of T<sub>FH</sub>-cells. **d** Relative contribution of each cell type (in %) in mild (upper panel) and critical (lower panel) pneumonia patients comparing COVID-19 vs non-COVID-19. **e** Numbers and percentages of CD8<sup>+</sup> T<sub>N</sub> (left) and T<sub>EM</sub> (right) T-cells shared by three CD8<sup>+</sup> T cell lineages. **f** Violin plot showing scores of cell cycle scores (G2M and S) and *MKI67* expression of T cell clusters. **g** Violin plot showing differential expression of genes in T-cells belonging to the CD8<sup>+</sup> T<sub>RM</sub> lineage in mild vs critical COVID-19 patients. **h** Expression of interferon response genes along the CD8<sup>+</sup> T<sub>RM</sub> trajectory. **i** Box plot showing 'resident memory' and 'naïve T-cell' scores of the CD8<sup>+</sup> T<sub>RM</sub> lineage from mild-moderate and critical patients. **j** Violin plot showing differential expression of genes in T-cells belonging to the CD8<sup>+</sup> T<sub>EX</sub> lineage in mild vs critical COVID-19 patients. **k** UMAP of CD4<sup>+</sup> T<sub>REG</sub> subclusters. **l** Volcano plot showing differentially expressed genes between *TNFRSF9*<sup>high</sup> and *TNFRSF9*<sup>low</sup> T<sub>REG</sub> subclusters. **m** Numbers and percentages of CD4<sup>+</sup> T<sub>hi</sub>-like (left) and T<sub>hi7</sub> (right) T-cells shared by three CD4<sup>+</sup> T cell lineages. **n** Violin plot showing differential expression of genes in T-cells belonging to the CD4<sup>+</sup> T<sub>hi</sub>-like lineage in mild vs critical COVID-19 patients. **o** Violin plot showing differential expression of genes in T-cells belonging to the CD4<sup>+</sup> T<sub>hi7</sub> lineage in mild vs critical COVID-19 patients.
