# Supplementary material for: Discriminating mild from critical COVID-19 by innate and adaptive immune single-cell profiling of bronchoalveolar lavages
Source: PubMed Central journal article supplement (PMC8027624; doi:10.1038/s41422-020-00455-9), 2021-01-21
Supplement: 41422_2020_455_MOESM3_ESM.pdf [file 41422_2020_455_MOESM3_ESM.pdf]

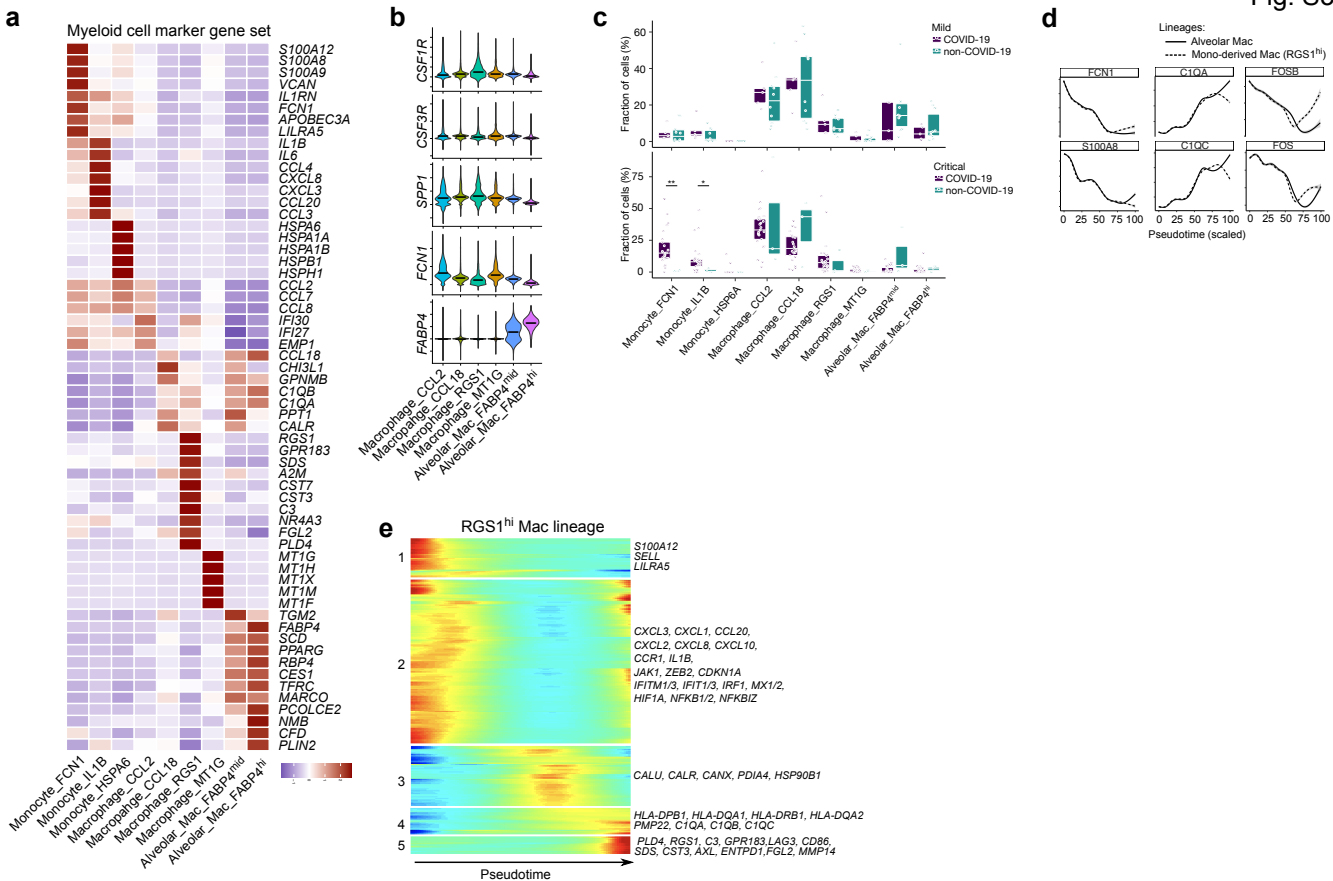

**Fig. S3 Single-cell profiling of myeloid cells**

**a** Heatmap showing myeloid cell phenotypes with corresponding marker gene sets. **b** Violin plots of normalized marker gene expression, distinguishing 6 macrophage subclusters based on their monocyte-derived characteristics, as indicated by monocyte lineage associated genes (*CSF1R*, *CSF3R*, *SPPI*, *FCN1*), and alveolar macrophage marker gene (*FABP4*). **c** Relative contribution of each cell type (in %) in mild (upper panel) and critical (lower panel) pneumonia patients comparing COVID-19 vs non-COVID-19. **d** Expression dynamics of key functional genes along the monocyte-to-macrophage trajectory. **e** Gene expression dynamics along the *RGS1*<sup>hi</sup> macrophage lineage. Genes cluster into 5 gene sets, each of them characterized by specific expression profiles, as depicted by a selection of marker gene characteristic for each set.
