# Supplementary material for: Discriminating mild from critical COVID-19 by innate and adaptive immune single-cell profiling of bronchoalveolar lavages
Source: PubMed Central journal article supplement (PMC8027624; doi:10.1038/s41422-020-00455-9), 2021-01-21
Supplement: 41422_2020_455_MOESM4_ESM.pdf [file 41422_2020_455_MOESM4_ESM.pdf]

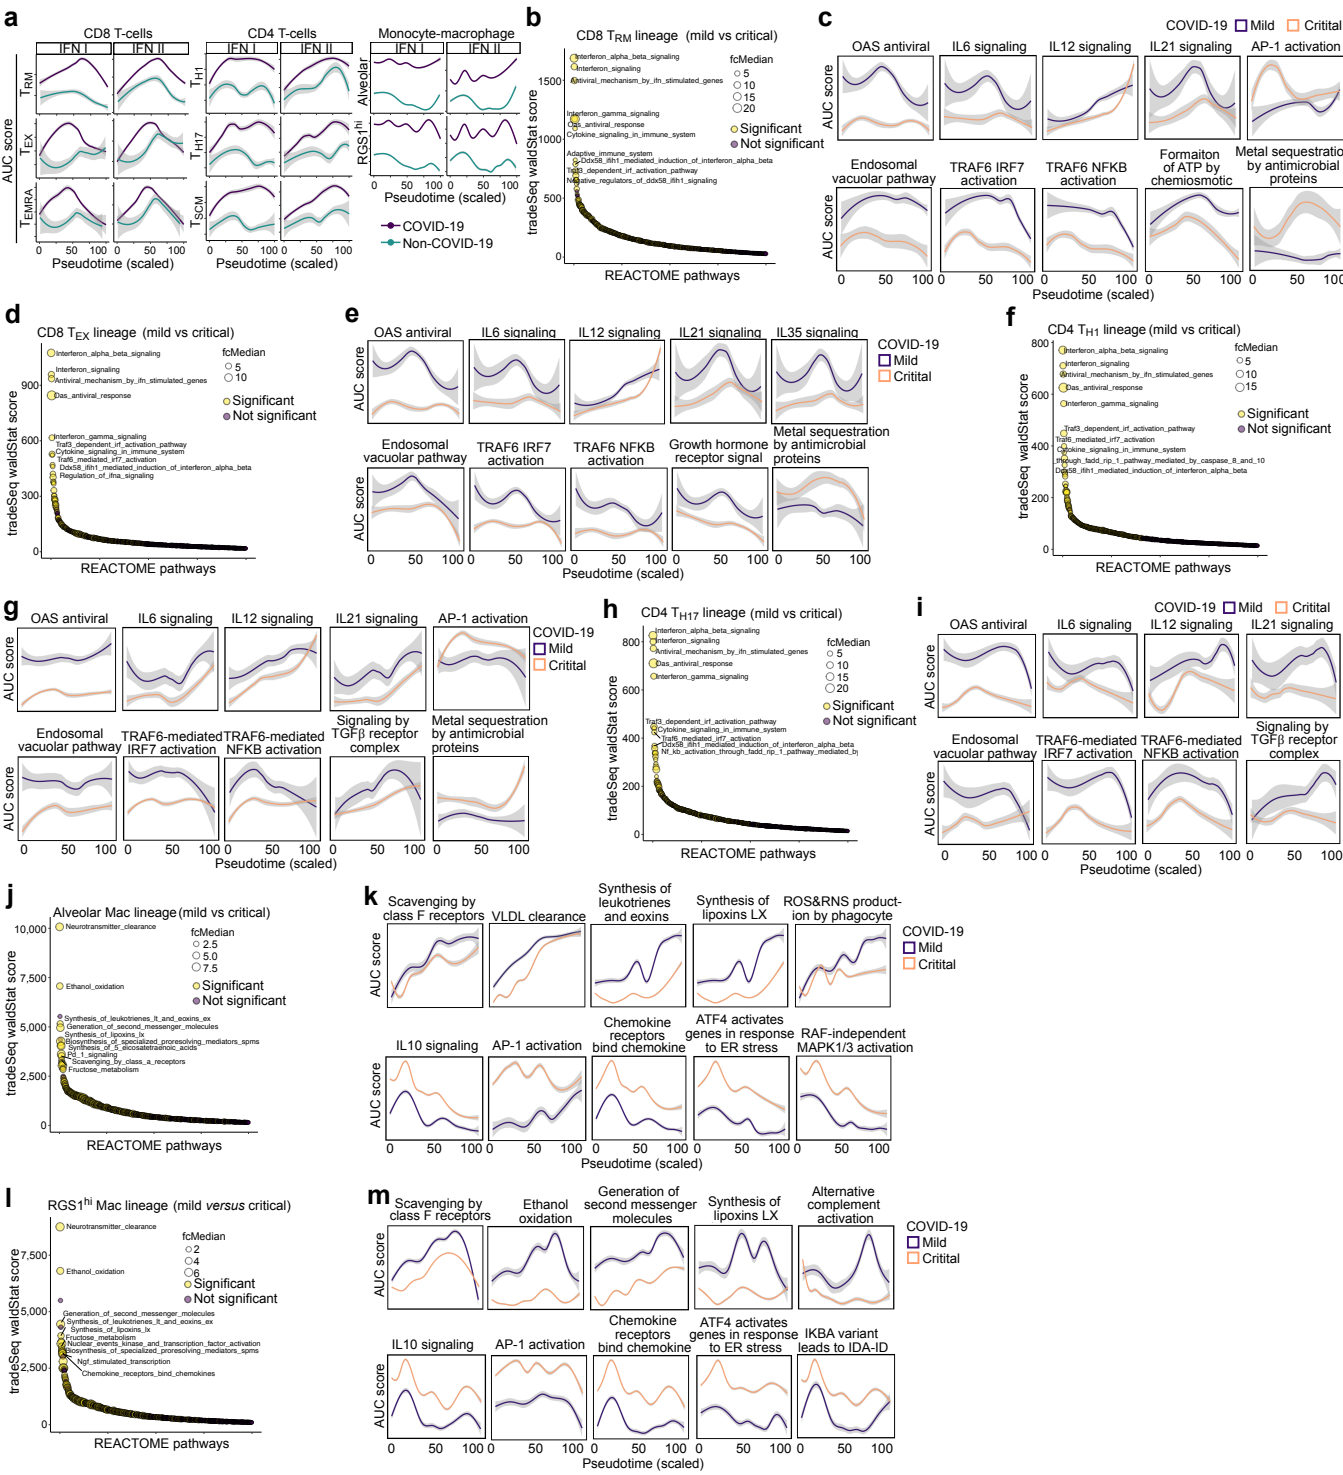

**Fig. S4 Pathway analysis along T-cell and monocyte-to-macrophage lineages**

**a** Differentially-activated IFN I and II pathways along the CD8<sup>+</sup>, CD4<sup>+</sup> and monocyte-to-macrophage lineages, comparing COVID-19 vs non-COVID-19. **b** Differentially-activated REACTOME pathways for the CD8<sup>+</sup> T<sub>RM</sub>-lineage, comparing mild vs critical COVID-19. **c** A selection of 10 differentially-activated REACTOME pathways along the CD8<sup>+</sup> T<sub>RM</sub>-lineage, comparing mild vs critical COVID-19. **d** Differentially-activated REACTOME pathways along the CD8<sup>+</sup> T<sub>EX</sub>-lineage, comparing mild vs critical COVID-19. **e** A selection of 10 differentially-activated REACTOME pathways along the CD8<sup>+</sup> T<sub>EX</sub>-lineage, comparing mild vs critical COVID-19. **f** Differentially-activated REACTOME pathways for the CD4<sup>+</sup> T<sub>H1</sub>-lineage, comparing mild vs critical COVID-19. **g** A selection of 10 differentially-activated REACTOME pathways along the CD4<sup>+</sup> T<sub>H1</sub>-lineage, comparing mild vs critical COVID-19. **h** Differentially-activated REACTOME pathways for the CD4<sup>+</sup> T<sub>H17</sub>-lineage, comparing mild vs critical COVID-19. **i** A selection of 8 differentially-activated REACTOME pathways along the CD4<sup>+</sup> T<sub>H17</sub>-lineage, comparing mild vs critical COVID-19. **j** Differentially-activated REACTOME pathways for the alveolar macrophage lineage, comparing mild vs critical COVID-19. **k** A selection of 10 differentially-activated REACTOME pathways along the alveolar macrophage lineage, comparing mild vs critical COVID-19. **l** Differentially-activated REACTOME pathways for the RGS1-macrophage lineage, comparing mild vs critical COVID-19. **m** A selection of 10 differentially-activated REACTOME pathways along the RGS1-macrophage lineage, comparing mild vs critical COVID-19.
