# Supplementary material for: Discriminating mild from critical COVID-19 by innate and adaptive immune single-cell profiling of bronchoalveolar lavages
Source: PubMed Central journal article supplement (PMC8027624; doi:10.1038/s41422-020-00455-9), 2021-01-21
Supplement: 41422_2020_455_MOESM5_ESM.pdf [file 41422_2020_455_MOESM5_ESM.pdf]

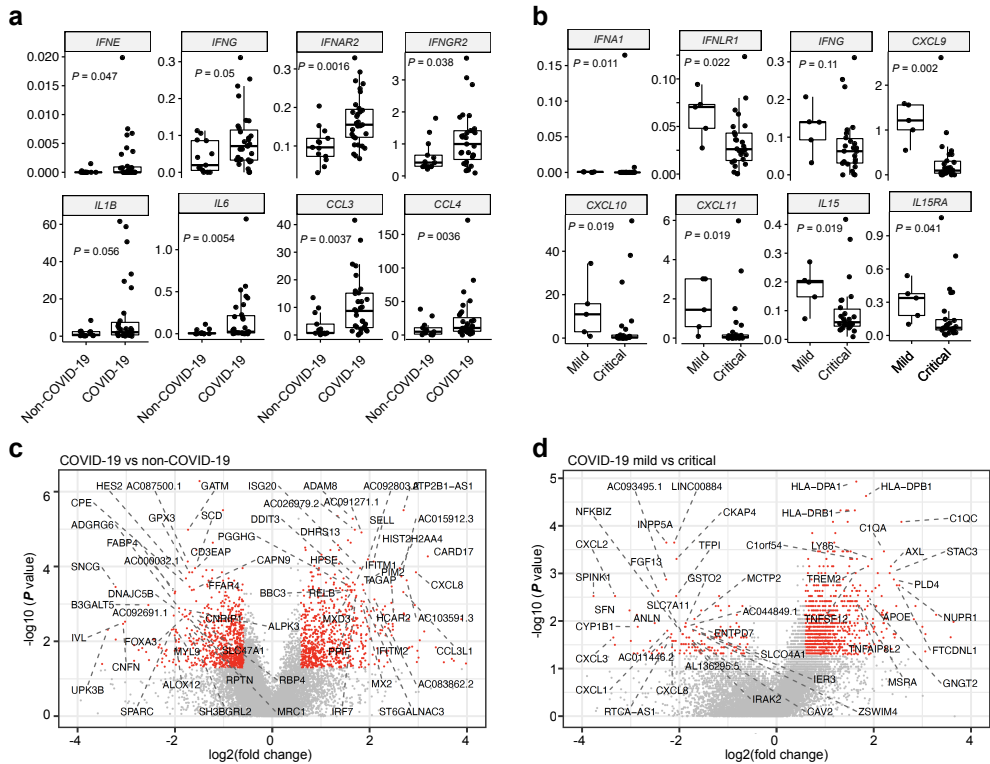

### Figure S5 Differentially expressed genes in different diseases and conditions

**a** Among all 27 interferon genes and their receptors detected in the scRNA-seq dataset, as well as several key chemokines/cytokines (*CXCL9*, *CXCL10*, *CXCL11*, *CCL3*, *CCL4*, *CCL8*, *IL6*, *IL1B*, *IL15*, *IL15RA*) related to anti-viral responses. Box plots showing differentially expressed genes in non-COVID-19 vs COVID-19 patients (calculated per patient,  $P \leq 0.05$  expect for *IL1B*). **b** Box plots showing differentially expressed interferon and receptor genes, as well as related cytokines in mild vs critical COVID-19 patients (calculated per patient,  $P < 0.05$  expect for *IFNG*). **c** Volcano plot of differentially expressed genes comparing COVID-19 vs non-COVID-19 patients (calculated per patient). Red dots,  $P < 0.05$ . **d** Volcano plot of differentially expressed genes comparing COVID-19 mild vs critical patients (calculated per patient). Red dots,  $P < 0.05$ .
