# Supplementary material for: Discriminating mild from critical COVID-19 by innate and adaptive immune single-cell profiling of bronchoalveolar lavages
Source: PubMed Central journal article supplement (PMC8027624; doi:10.1038/s41422-020-00455-9), 2021-01-21
Supplement: 41422_2020_455_MOESM7_ESM.pdf [file 41422_2020_455_MOESM7_ESM.pdf]

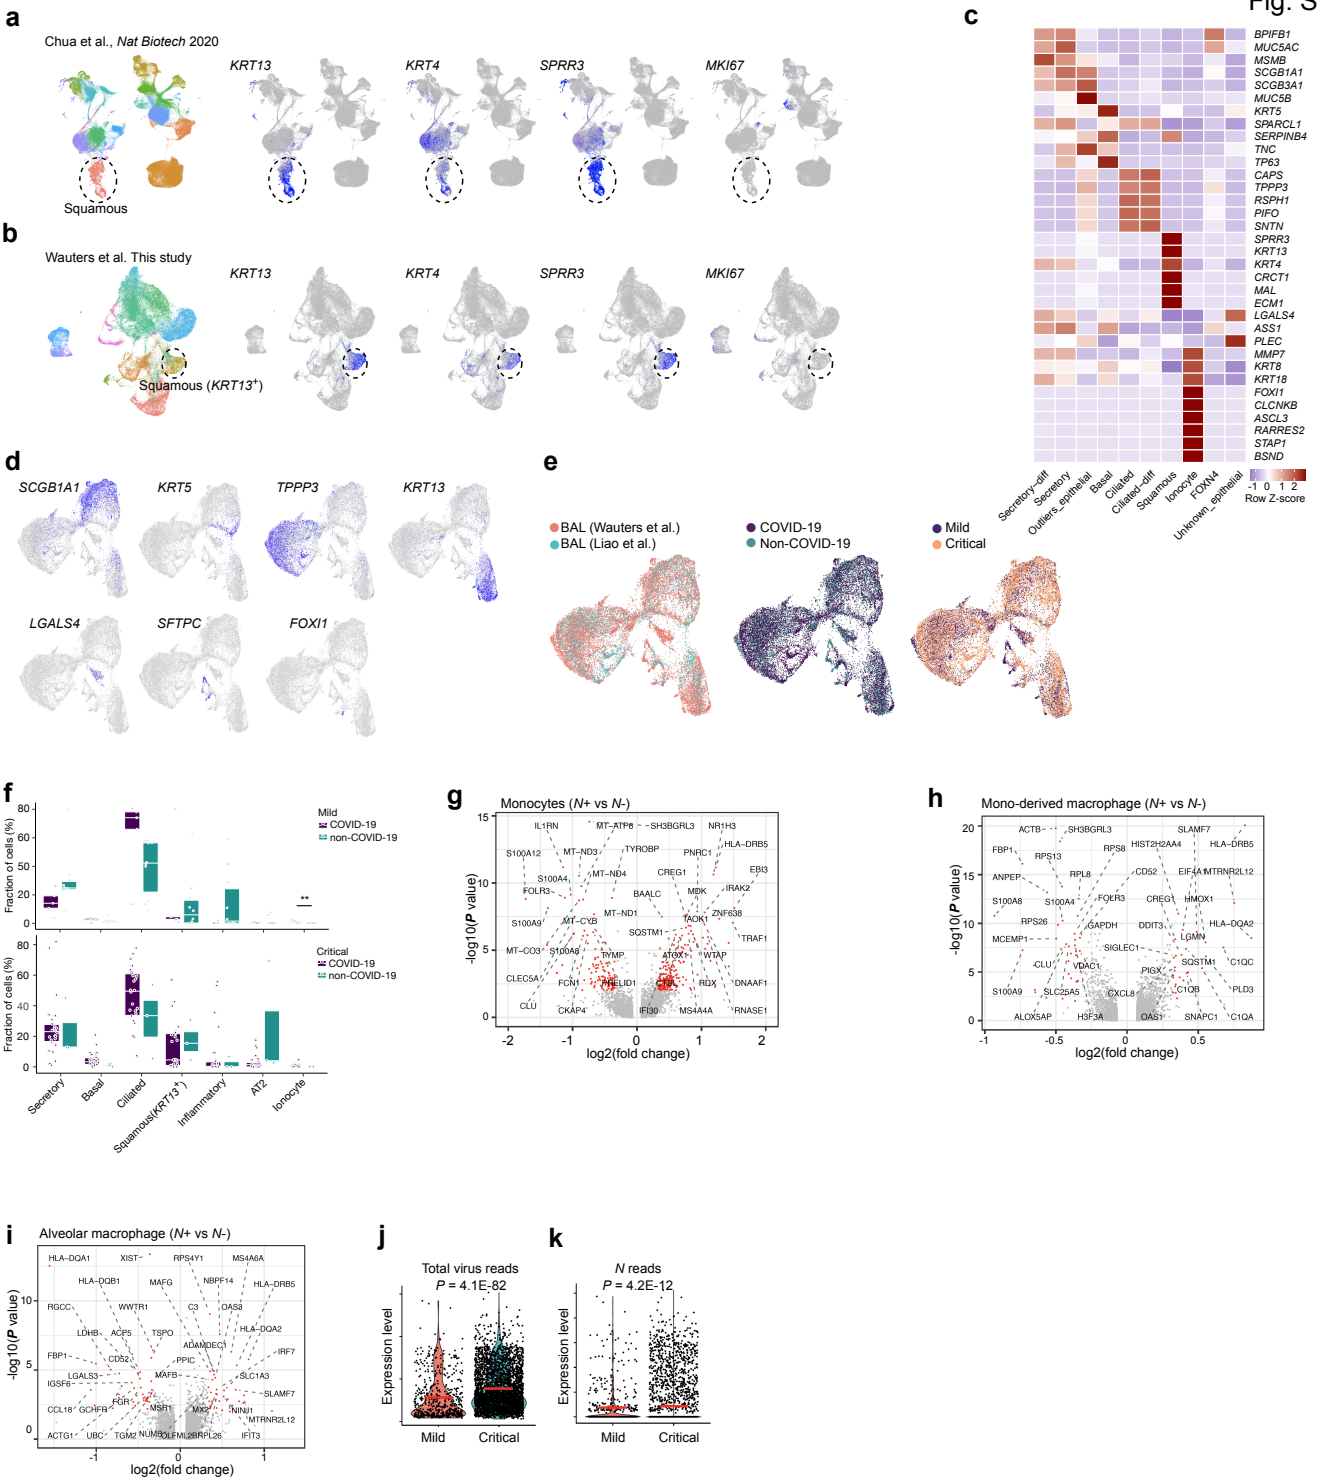

**Figure S7. Epithelial cell types and viral-host interaction**

**a** UMAP from Chua et al. showing marker gene expression (*KRT13*, *KRT4* and *SPRR3*) and *MKI67* expression in a subset of epithelial cells. **b** Expression of these genes in the epithelial cells identified by Wauters et al. **c** Heatmap of epithelial marker genes defined in Fig. 7b (AT2 markers excluded) plotted for epithelial cell types defined in Chua et al. dataset. **d** Feature plots of marker genes, distinguishing 7 epithelial cell subclusters: secretory cells (*SCGB1A1*), basal cells (*KRT5*), ciliated cells (*TPPP3*), squamous cells (*KRT13*), inflammatory cells (*LGALS4*), alveolar type II cells (*SFTPC*) and ionocytes (*FOX11*). **e** UMAP of 22,215 epithelial cells, color-coded per data origin (left), per disease status (middle) and per disease severity status (right). **f** Relative contribution of each epithelial cell type (in %) in mild (upper panel) and critical (lower panel) pneumonia patients comparing COVID-19 vs non-COVID-19. **g-i** Differentially expressed genes in  $N+$  vs  $N-$  monocytes (**g**), monocyte-derived macrophages (**h**) and alveolar macrophages (**i**). **j-k** Violin plots comparing the number of reads mapping to the complete viral genome (**j**) and the  $N$  sequence of the viral genome (**k**) between mild and critical COVID-19 patients.
