# Supplementary material for: Discriminating mild from critical COVID-19 by innate and adaptive immune single-cell profiling of bronchoalveolar lavages
Source: PubMed Central journal article supplement (PMC8027624; doi:10.1038/s41422-020-00455-9), 2021-01-21
Supplement: 41422_2020_455_MOESM8_ESM.pdf [file 41422_2020_455_MOESM8_ESM.pdf]

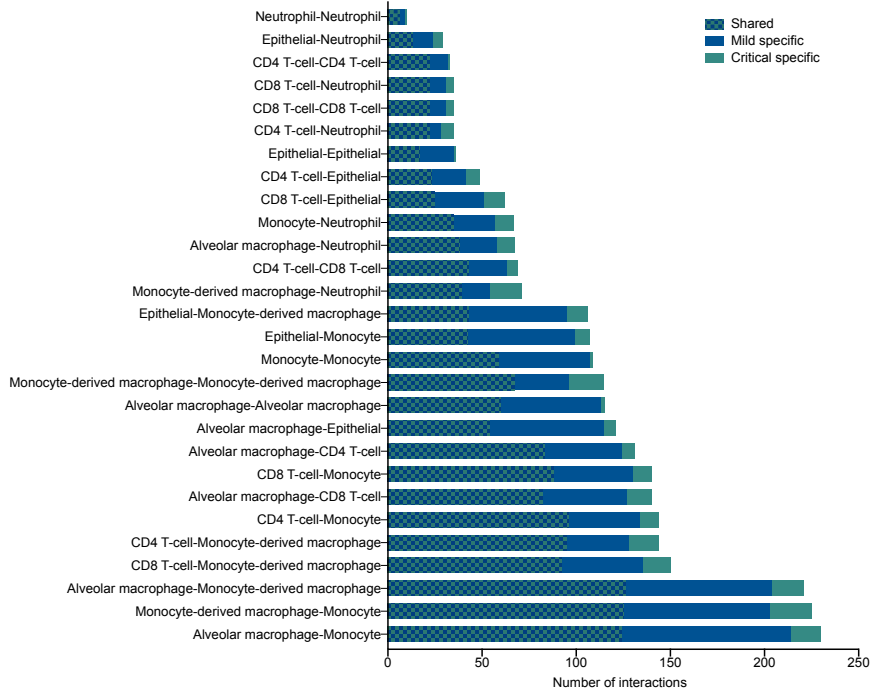

**Figure S8. Cell-to-cell interactions shared and specific in mild and critical COVID-19 BAL**  
 Predicted number of cell-to-cell interactions between epithelial cell, neutrophil, monocyte, macrophage, CD8<sup>+</sup>/CD4<sup>+</sup> T-cell from BAL of mild vs critical COVID-19.
