# Supplementary material for: Discriminating mild from critical COVID-19 by innate and adaptive immune single-cell profiling of bronchoalveolar lavages
Source: PubMed Central journal article supplement (PMC8027624; doi:10.1038/s41422-020-00455-9), 2021-01-21
Supplement: 41422_2020_455_MOESM9_ESM.pdf [file 41422_2020_455_MOESM9_ESM.pdf]

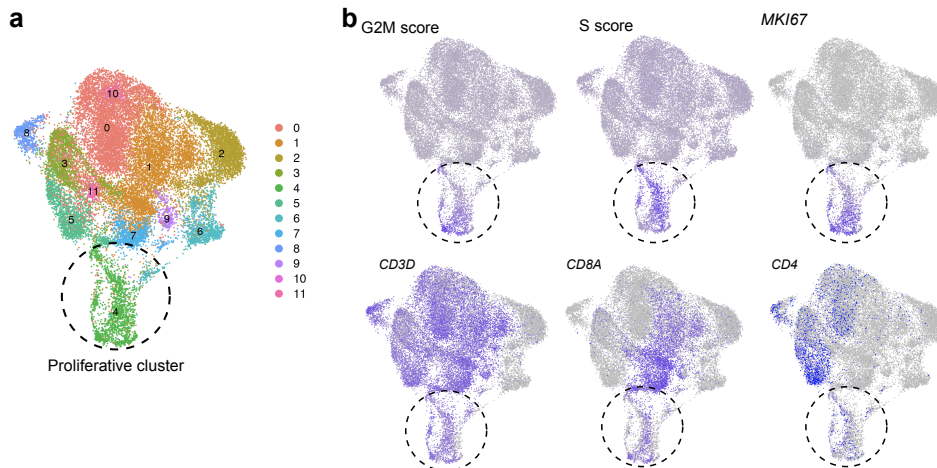

**Figure S9. T cell clustering without regressing out cell cycle effect**

**a** UMAP of T cell clusters without regressing out cell cycle. Cluster 4 is a proliferative cluster. **b** UMAP of T cells showing cell cycle scores (G2M and S) and key marker genes.
