# Supplementary material for: Discriminating mild from critical COVID-19 by innate and adaptive immune single-cell profiling of bronchoalveolar lavages
Source: PubMed Central journal article supplement (PMC8027624; doi:10.1038/s41422-020-00455-9), 2021-01-21
Supplement: 41422_2020_455_MOESM10_ESM.pdf [file 41422_2020_455_MOESM10_ESM.pdf]

**Supplementary Table S1. Demographics and characteristics of study cohort.**

|                                            | Mild COVID-19 (n=2) | Critical COVID-19 (n=20) | Mild non-COVID pneumonia (n=10) | Critical non-COVID pneumonia (n=3) |
|--------------------------------------------|---------------------|--------------------------|---------------------------------|------------------------------------|
| Age, years <sup>a</sup>                    | 63 [55-71]          | 60 [54.5-68]             | 67.5 [58.75-72.5]               | 73 [72-74.5]                       |
| Sex                                        | ..                  | ..                       | ..                              | ..                                 |
| Men                                        | 1 (50)              | 15 (75)                  | 5 (50)                          | 2 (67)                             |
| Women                                      | 1 (50)              | 5 (25)                   | 5 (50)                          | 1 (33)                             |
| Co-morbid conditions                       |                     |                          |                                 |                                    |
| Diabetes mellitus type II                  | 1 (50)              | 3 (15)                   | 1 (10)                          | 1 (33)                             |
| Arterial hypertension                      | 2 (100)             | 14 (70)                  | 5 (50)                          | 3 (100)                            |
| Medication history                         | ..                  | ..                       | ..                              | ..                                 |
| Immunosuppressants                         | 1 (50) <sup>b</sup> | 0 (0)                    | 4 (40) <sup>c</sup>             | 0 (0)                              |
| CT severity score <sup>d</sup>             | 7.5 [7-8]           | 16 [12-23] <sup>e</sup>  | 3.5 [1-7.5]                     | 6 [6-11.5]                         |
| Time from illness onset to sampling (days) | 17.5 [15-20]        | 19 [15.75-25]            | 10.5 [2.5-14.75]                | 9 [5-19]                           |
| Bronchoalveolar lavage microbiology        | ..                  | ..                       | ..                              | ..                                 |
| SARS-CoV-2 PCR positive                    | 2 (100)             | 7 (35) <sup>f</sup>      | 0 (0)                           | 0 (0)                              |
| Other viral PCR positive                   | 0 (0)               | 4 (20) <sup>g</sup>      | 2 (20) <sup>h</sup>             | 1 (33) <sup>i</sup>                |
| Bacterial culture positive                 | 1 (50) <sup>j</sup> | 3 (15) <sup>k</sup>      | 1 (10) <sup>l</sup>             | 1 (33) <sup>m</sup>                |
| PJP PCR positive                           | 0 (0)               | 0 (0)                    | 5 (50)                          | 0 (0)                              |
| Respiratory support                        | 2 (100)             | 20 (100)                 | 8 (80)                          | 3 (100)                            |
| Oxygen via nasal cannula                   | 2 (100)             | 0 (0)                    | 8 (80)                          | 0 (0)                              |
| High-flow oxygen therapy                   | 0 (0)               | 0 (0)                    | 0 (0)                           | 1 (33)                             |
| Mechanical ventilation                     | 0 (0)               | 15 (75)                  | 0 (0)                           | 2 (67)                             |
| Extracorporeal membrane oxygenation        | 0 (0)               | 5 (25)                   | 0 (0)                           | 0 (0)                              |
| Medical treatment                          | 2 (100)             | 20 (100)                 | 7 (70)                          | 3 (100)                            |
| Antiviral therapy (<7d)                    | 0 (0)               | 14 (70) <sup>n</sup>     | 0 (0)                           | 0 (0)                              |
| Antibiotics (<7d)                          | 2 (100)             | 20 (100)                 | 7 (70)                          | 3 (100)                            |
| Immunomodulatory therapy (<7d)             | 0 (0)               | 5 (25) <sup>o</sup>      | 0 (0)                           | 0 (0)                              |
| Fatal outcome <sup>p</sup>                 | 0 (0)               | 1 (5)                    | 1 (10)                          | 1 (33)                             |

**Legend to Supplementary Table S1:** Data are median [IQR], median [range] for the “Mild COVID-19” group or n (%). <sup>a</sup> Prespecified subgroups were well matched demographically, except for a significant older age of critical non-COVID compared to COVID-19 patients. Statistical analyses are shown in Table S11. <sup>b</sup> 1 patient received chemotherapy. <sup>c</sup> 2 patients received chemotherapy, 1 patient taking abemaciclib and 1 patient taking mycophenolate mofetil/tacrolimus. <sup>d</sup> A CT score was assigned by converting percentage of lung parenchyma opacity for each lobe into a 5-points Likert scale: a score of 0 for 0% lung opacity (LO), 1 for 1% to <5% LO, 2 for 5- 25% LO, 3 for 26-50% LO, 4 for 51-75% LO and 5 for 76-100 LO. The total CT score is the sum of the individual lobar scores. COVID-19 disease status and disease severity both independently predicted CT Score, as assessed by logistic regression (P=0,047 and P=0,024 respectively (Wald test)). <sup>e</sup> No chest CT available for 3 patients. <sup>f</sup> SARS-CoV-2 PCR not performed in 12 cases and 1 negative SARS-CoV-2 PCR on BAL (after initial

PCR-confirmed diagnosis of COVID-19). <sup>g</sup> Herpes Simplex I PCR positive in 4 cases. <sup>h</sup> Herpes Simplex I PCR positive in 2 cases, 1 case of PCR-confirmed coronavirus HKU-1 co-infection. <sup>i</sup> Herpes Simplex I PCR positive in 1 case. <sup>j</sup> 1 patient with positive *Escherichia coli* and *Pseudomonas aeruginosa* culture. <sup>k</sup> 3 patients with cultures positive for *Raoultella ornithinolytica*, *Klebsiella aerogenes* or *Enterobacter cloacae*. <sup>l</sup> 1 patient with cultures positive for *Escherichia coli*; in 4 patients, organism remained unidentified, 2 of them received prior antibiotics. <sup>m</sup> 1 patient with cultures positive for *Pseudomonas aeruginosa*; in 2 patients, organism remained unidentified, 2 of them received prior antibiotics. <sup>n</sup> Hydroxychloroquine administered in 12 cases, remdesivir administered in 2 cases. <sup>o</sup> 5 patients received >1 mg/kg prednisone during 48h preceding sampling; 1 patient received Anakinra during the week preceding sampling. <sup>p</sup> Recruitment started on March 27<sup>th</sup> 2020, with outcome assessed on June 11<sup>th</sup> 2020. PJP: Pneumocystis jirovecii; SARS-CoV-2: Severe acute respiratory syndrome coronavirus 2.
